**ADULT & CHILD PSYCHIATRISTS** - Southern California  
**INPATIENT PSYCHIATRIST** - Los Angeles, California  
**GERIATRIC PSYCHIATRIST** - West Covina, California

Southern California Permanente Medical Group is a physician-led, partnership organization with a patient-centered and evidence-based medicine approach.

SCPMG is proud to offer its physicians:

- 4 1/2 day work week (8-10 hours) \*
- Flexible schedules
- Education time (1/2 day a week) \*
- 1 hour for initial evaluations and 30 minutes for follow-ups
- Multi-disciplinary team consisting of Nurses, LCSWs, Psychologists and MAs
- Medical, Dental, Vision, Life & Supplemental Comprehensive Insurance
- Robust retirement plans: Pension Plan, 401K and Keogh
- Excellent salary and compensation package (bonuses offered)
- Partnership eligibility after 3 years

\* Not available for the Inpatient Psychiatrist opportunity.

We invite you to make a difference in the community we serve. **For consideration or to apply, please visit our website at <http://scpmgphysiciancareers.com>.**

For additional information, please contact Jolanta Buschini at [Jolanta.U.Buschini@kp.org](mailto:Jolanta.U.Buschini@kp.org) or call (866) 872-7809.

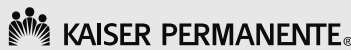

Southern California Permanente Medical Group

We are an AAP/EEO employer.

The **Answer**  
to Health Care  
in America.

**The American Psychiatric Association  
Publishing Textbook of Psychosomatic  
Medicine and Consultation-Liaison  
Psychiatry, Third Edition**

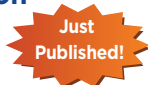

*Edited by James L. Levenson, M.D.*

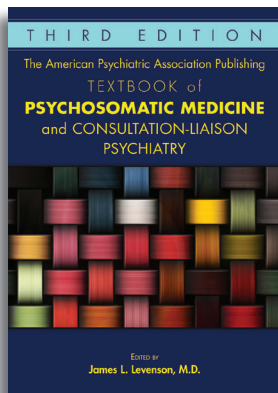

This book is an essential resource for psychiatry residents, psychosomatic medicine fellows, attending psychiatrists, and other specialists who need to stay up to date with the rapidly expanding evidence base in the field.

2019 • 1,594 pages • ISBN 978-1-61537-136-5 • Hardcover • \$225.00 • Item #37136

2019 • 1,594 pages • ISBN 978-1-61537-199-0 • eBook • \$180.00 • Item #37199

AMERICAN  
PSYCHIATRIC  
ASSOCIATION  
PUBLISHING

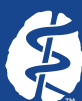

[www.appi.org](http://www.appi.org)  
Email: [appi@psych.org](mailto:appi@psych.org)  
Phone: 1-800-368-5777

AH1840A

# Psychiatrists

## MINNESOTA

HealthPartners is one of the Upper Midwest's leading multispecialty physician groups. We have practice opportunities for talented, caring BC/BE psychiatrists in metropolitan Minneapolis/St. Paul and central Minnesota.

### Inpatient/Adult

- **Regions Hospital (St. Paul, MN)**

Our state-of-the-art inpatient psychiatric facilities allow our team of psychiatrists, residents, therapists, social workers, NPs/PAs and nursing staff to provide exceptional care to adult psychiatric inpatients. Our Regions care model schedule is 7 days on/7 days off.

### Outpatient/Adult

- **Central Minnesota (Sartell/St. Cloud)**

- **Metropolitan Minneapolis/St. Paul**

These teams provide integrated outpatient mental health services in our primary care and outpatient specialty clinics located within a variety of urban, suburban and semi-rural communities. Full-time or part-time practices are available. No hospital call responsibilities.

In addition to competitive salaries, HealthPartners offers an excellent benefits package, including an employer-matched 401(k) and 457(b), generous personal time off, malpractice insurance coverage, and more.

---

Let us tell you more! Please forward your CV and cover letter to:  
**[lori.m.fake@healthpartners.com](mailto:lori.m.fake@healthpartners.com)**, apply online at **[healthpartners.com/careers](http://healthpartners.com/careers)**, or call 800-472-4695 x1. EOE

---

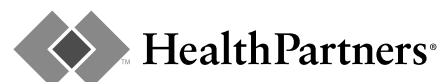

# The DSM-5 Collection

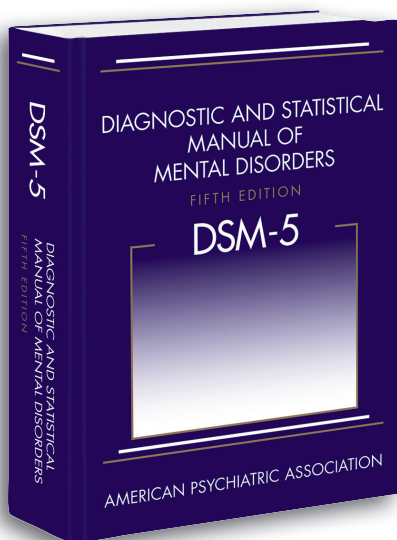

## Diagnostic and Statistical Manual of Mental Disorders, Fifth Edition (DSM-5®)

American Psychiatric Association

This new edition of *Diagnostic and Statistical Manual of Mental Disorders* (DSM-5®), used by clinicians and researchers to diagnose and classify mental disorders, is the product of more than 10 years of effort by hundreds of international experts in all aspects of mental health. Their dedication and hard work have yielded an authoritative volume that defines and classifies mental disorders in order to improve diagnosis, treatment, and research.

The criteria are concise and explicit, intended to facilitate an objective assessment of symptom presentations in a variety of clinical settings—inpatient, outpatient, partial hospital, consultation-liaison, clinical, private practice, and primary care.

- The latest findings in neuroimaging and genetics have been integrated into each disorder along with gender and cultural considerations.
- The revised organizational structure recognizes symptoms that span multiple diagnostic categories, providing new clinical insights in diagnosis.

- Both ICD-9-CM and ICD-10-CM codes are included for each disorder.

The *Diagnostic and Statistical Manual of Mental Disorders*, Fifth Edition, is the most comprehensive, current, and critical resource for clinical practice available to today's mental health professionals.

2013 • 991 pages • ISBN 978-0-89042-554-1 • Hardcover • \$210.00 • Item #2554

2013 • 991 pages • ISBN 978-0-89042-555-8 • Paperback • \$160.00 • Item #2555

2013 • 991 pages • ISBN 978-0-89042-557-2 • eBook • \$128.00 • Item #2557

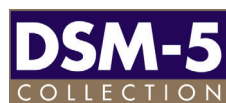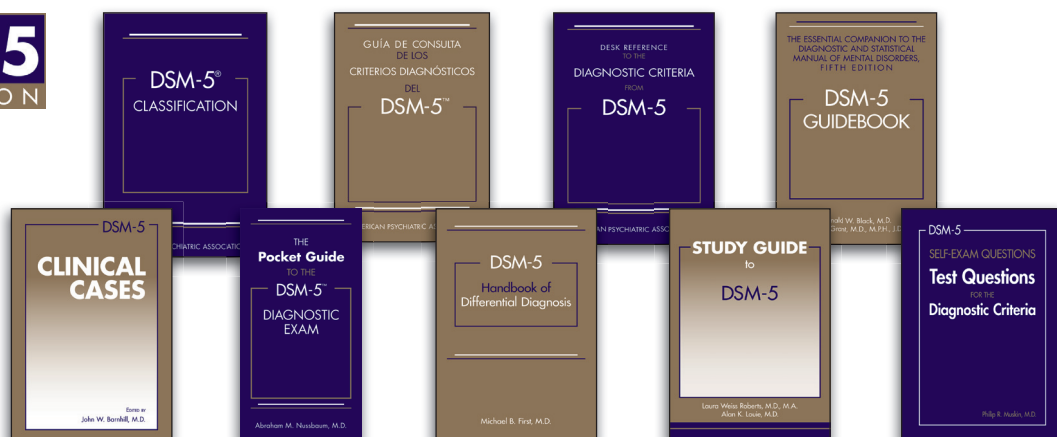

AMERICAN  
PSYCHIATRIC  
ASSOCIATION  
PUBLISHING

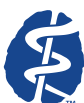

Order Online: [www.appi.org](http://www.appi.org)  
Phone: 703-907-7322  
Toll Free: 1-800-368-5777  
Email: [appi@psych.org](mailto:appi@psych.org)

20% Discount for American Psychiatric  
Association Members

25% Discount for APA Resident-Fellow Members

AH1842A

JUST PUBLISHED!

## Competency in Combining Pharmacotherapy and Psychotherapy Integrated and Split Treatment, Second Edition

### Core Competencies in Psychotherapy

Michelle B. Riba, M.D., M.S., Richard Balon, M.D.,  
and Laura Weiss Roberts, M.D., M.A.

Series Editor: Glen O. Gabbard, M.D.

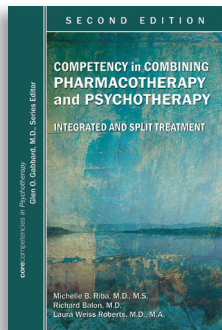

This book is designed to help psychiatrists at any stage of their career achieve competency in combining and coordinating pharmacotherapeutic and psychotherapeutic treatments for the benefit of their patients.

This second edition, addresses both integrated

(single clinician) and split/collaborative (multiple clinicians) treatments, discussing for each:

- The selection of medication and psychotherapy
- The patient evaluation and opening
- Sequencing
- Evaluating, monitoring, and supervising treatment
- Terminating and transitioning patient care

The book also offers a chapter—new to this second edition—that focuses on primary care access for mental health services in the context of integrated and split/collaborative care.

2018 • 175 pages • ISBN 978-1-61537-066-5 • Paperback • \$65.00 • Item #37066

2018 • 175 pages • ISBN 978-1-61537-180-8 • eBook • \$52.00 • Item #37180

20% Discount for American Psychiatric Association Members

25% Discount for APA Resident-Fellow Members

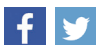

AMERICAN  
PSYCHIATRIC  
ASSOCIATION  
PUBLISHING

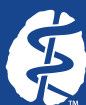

Order @ [www.appi.org](http://www.appi.org)

Email: [appi@psych.org](mailto:appi@psych.org)

Phone: 1-800-368-5777

Priority Code AH1805A

## New Releases!

See you in Seattle at the  
AACAP 65th Annual Meeting  
Booth #112

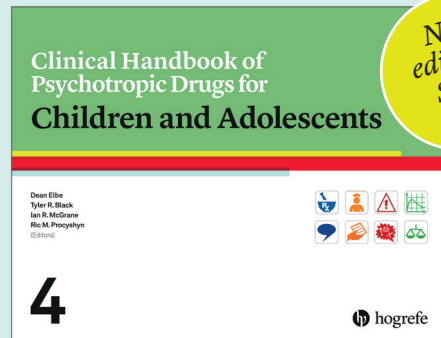

Dean Elbe/Tyler R. Black/Ian R. McGrane/Ric M. Procyshyn (Eds.)

### Clinical Handbook of Psychotropic Drugs for Children and Adolescents

4th ed. 2019, iv + 396 pp.

+ 50 pp. of PDF patient/caregiver information sheets

US \$99.80 **US \$74.85 if you order before October 31, 2018**

ISBN 978-0-88937-550-5

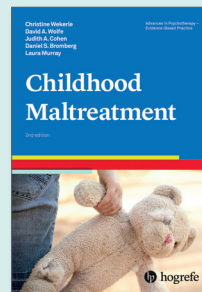

Christine Wekerle/  
David A. Wolfe/Judith A. Cohen/  
Daniel S. Bromberg/Laura Murray

### Childhood Maltreatment

(Advances in Psychotherapy –  
Evidence-Based Practice – Vol. 4)

2nd ed. 2019, viii + 100 pp.

US \$29.80

ISBN 978-0-88937-418-8

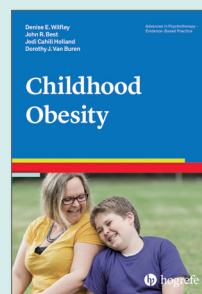

Denise E. Wilfley/John R. Best/  
Jodi Cahill Holland/  
Dorothy J. Van Buren

### Childhood Obesity

(Advances in Psychotherapy –  
Evidence-Based Practice – Vol. 39)

2019, x + 80 pp.

US \$29.80

ISBN 978-0-88937-406-5

Tel. 800 228 3749 (toll-free in North America)

[customerservice@hogrefe.com](mailto:customerservice@hogrefe.com)

[www.hogrefe.com](http://www.hogrefe.com)

 **hogrefe**

## Subscription and Business Information

*The American Journal of Psychiatry*, ISSN 0002-953X, is published monthly by the American Psychiatric Association.

The American Psychiatric Association does not hold itself responsible for statements made in its publications by contributors or advertisers. Unless so stated, material in *The American Journal of Psychiatry* does not reflect the endorsement, official attitude, or position of the American Psychiatric Association or of the Journal's Editorial Board.

Periodicals postage paid at Washington, DC, and additional mailing offices. POSTMASTER: Send address changes to *The American Journal of Psychiatry*, Circulation Department, American Psychiatric Association, 800 Maine Avenue, S.W., Suite 900, Washington, D.C. 20024.

### Editorial Office

*American Journal of Psychiatry*  
American Psychiatric Association  
800 Maine Avenue, S.W., Suite 900  
Washington, D.C. 20024  
E-mail: [ajp@psych.org](mailto:ajp@psych.org)

### Customer Service

Phone: (800) 368-5777 (toll-free)  
E-mail: [appi@psych.org](mailto:appi@psych.org)

### APA Member Subscription Services

Phone: (888) 35-PSYCH (toll-free)

### Subscriptions

Per year: individual \$333.00,  
international \$500.00

Institutional subscriptions are tier priced. For institutional site license or pricing information, contact (202) 559-3729 or [institutions@psych.org](mailto:institutions@psych.org).

*Additional subscription options, including single issues and student rates*  
Contact Customer Service

### Advertising

*Pharmaceutical Print and Online Advertising*  
Frank Cox, Kathleen Harrison, Tim Wolfinger  
Pharmaceutical Media, Inc.  
30 East 33rd Street  
New York, NY 10016  
Phone: (212) 904-0379  
E-mail: [twolfinger@pminy.com](mailto:twolfinger@pminy.com)

### *Nonpharmaceutical and Online Sales*

Eamon Wood  
Pharmaceutical Media, Inc.  
E-mail: [ewood@pminy.com](mailto:ewood@pminy.com)  
(see address and phone above).

### Permissions and Reprints

Material published in the journals of the American Psychiatric Association and American Psychiatric Association Publishing is protected by copyright and all rights are reserved. Material may not be reproduced in any form or by any means without written permission from the copyright owner. For permission to reproduce material published by APA, please visit <http://www.appi.org/customer-service/permissions> for more information. Permission can also be secured through the Copyright Clearance Center ([www.copyright.com](http://www.copyright.com)).

APA does not require that permission be obtained for the photocopying of isolated articles for nonprofit classroom or library reserve use; all fees associated with such permission are waived. This consent does not extend to other kinds of copying, such as copying for general distribution, for advertising or promotional purposes, for creating new collective works, or for resale. Requests for commercial distribution should be directed to (202) 609-7075.

For bulk reprints, please contact Jane Cha, (202) 609-7075; e-mail: [jcha@psych.org](mailto:jcha@psych.org).

Indexed in Abstracts for Social Workers, Academic Abstracts, Biological Abstracts, Chemical Abstracts, Chicago Psychoanalytic Literature Index, Cumulative Index to Nursing Literature, Excerpta Medica, Hospital Literature Index, Index Medicus, International Nursing Index, Nutrition Abstracts, Psychological Abstracts, Science Citation Index, Social Science Source, and Social Sciences Index.

Pages are produced by Sheridan Journal Services (Waterbury, VT) and printed by Sheridan NH (Hanover, NH) on acid-free paper effective with Volume 169, Number 1, January 2012.

© 2018 American Psychiatric Association.

**Brief Summary:** for full Prescribing Information and Patient Information, refer to package insert.

## INDICATIONS AND USAGE

INGREZZA® is indicated for the treatment of adults with tardive dyskinesia.

## CONTRAINDICATIONS

INGREZZA is contraindicated in patients with a history of hypersensitivity to valbenazine or any components of INGREZZA. Rash, urticaria, and reactions consistent with angioedema (e.g., swelling of the face, lips, and mouth) have been reported.

## WARNINGS AND PRECAUTIONS

### Somnolence

INGREZZA can cause somnolence. Patients should not perform activities requiring mental alertness such as operating a motor vehicle or operating hazardous machinery until they know how they will be affected by INGREZZA.

### QT Prolongation

INGREZZA may prolong the QT interval, although the degree of QT prolongation is not clinically significant at concentrations expected with recommended dosing. In patients taking a strong CYP2D6 or CYP3A4 inhibitor, or who are CYP2D6 poor metabolizers, INGREZZA concentrations may be higher and QT prolongation clinically significant. For patients who are CYP2D6 poor metabolizers or are taking a strong CYP2D6 inhibitor, dose reduction may be necessary. For patients taking a strong CYP3A4 inhibitor, reduce the dose of INGREZZA to 40 mg once daily. INGREZZA should be avoided in patients with congenital long QT syndrome or with arrhythmias associated with a prolonged QT interval. For patients at increased risk of a prolonged QT interval, assess the QT interval before increasing the dosage.

## ADVERSE REACTIONS

The following adverse reactions are discussed in more detail in other sections of the labeling:

- Hypersensitivity
- Somnolence
- QT Prolongation

### Clinical Trials Experience

Because clinical trials are conducted under widely varying conditions, adverse reaction rates observed in the clinical trials of a drug cannot be directly compared to rates in the clinical trials of another drug and may not reflect the rates observed in practice.

#### Variable and Fixed Dose Placebo-Controlled Trial Experience

The safety of INGREZZA was evaluated in 3 placebo-controlled studies, each 6 weeks in duration (fixed dose, dose escalation, dose reduction), including 445 patients. Patients were 26 to 84 years of age with moderate to severe tardive dyskinesia and had concurrent diagnoses of mood disorder (27%) or schizophrenia/schizoaffective disorder (72%). The mean age was 56 years. Patients were 57% Caucasian, 39% African-American, and 4% other. With respect to ethnicity, 28% were Hispanic or Latino. All subjects continued previous stable regimens of antipsychotics; 85% and 27% of subjects, respectively, were taking atypical and typical antipsychotic medications at study entry.

#### Adverse Reactions Leading to Discontinuation of Treatment

A total of 3% of INGREZZA treated patients and 2% of placebo-treated patients discontinued because of adverse reactions.

#### Common Adverse Reactions

Adverse reactions that occurred in the 3 placebo-controlled studies at an incidence of  $\geq 2\%$  and greater than placebo are presented in Table 1.

**Table 1: Adverse Reactions in 3 Placebo-Controlled Studies of 6-week Treatment Duration Reported at  $\geq 2\%$  and  $>$ Placebo**

| Adverse Reaction <sup>1</sup>                                                                                  | INGREZZA (n=262) (%) | Placebo (n=183) (%) |
|----------------------------------------------------------------------------------------------------------------|----------------------|---------------------|
| <b>General Disorders</b>                                                                                       |                      |                     |
| Somnolence (somnolence, fatigue, sedation)                                                                     | 10.9%                | 4.2%                |
| <b>Nervous System Disorders</b>                                                                                |                      |                     |
| Anticholinergic effects (dry mouth, constipation, disturbance in attention, vision blurred, urinary retention) | 5.4%                 | 4.9%                |
| Balance disorders/fall (fall, gait disturbance, dizziness, balance disorder)                                   | 4.1%                 | 2.2%                |
| Headache                                                                                                       | 3.4%                 | 2.7%                |
| Akathisia (akathisia, restlessness)                                                                            | 2.7%                 | 0.5%                |
| <b>Gastrointestinal Disorders</b>                                                                              |                      |                     |
| Vomiting                                                                                                       | 2.6%                 | 0.6%                |
| Nausea                                                                                                         | 2.3%                 | 2.1%                |
| <b>Musculoskeletal Disorders</b>                                                                               |                      |                     |
| Arthralgia                                                                                                     | 2.3%                 | 0.5%                |

<sup>1</sup> Within each adverse reaction category, the observed adverse reactions are listed in order of decreasing frequency.

**Other Adverse Reactions Observed During the Premarketing Evaluation of INGREZZA**  
 Other adverse reactions of  $\geq 1\%$  incidence and greater than placebo are shown below. The following list does not include adverse reactions: 1) already listed in previous tables or elsewhere in the labeling, 2) for which a drug cause was remote, 3) which were so general as to be uninformative, 4) which were not considered to have clinically significant implications, or 5) which occurred at a rate equal to or less than placebo.

**Endocrine Disorders:** blood glucose increased

**General Disorders:** weight increased

**Infectious Disorders:** respiratory infections

**Neurologic Disorders:** drooling, dyskinesia, extrapyramidal symptoms (non-akathisia)

**Psychiatric Disorders:** anxiety, insomnia

During controlled trials, there was a dose-related increase in prolactin. Additionally, there was a dose-related increase in alkaline phosphatase and bilirubin, suggesting a potential risk for cholestasis.

### Postmarketing Experience

The following adverse reactions have been identified during post-approval use of INGREZZA that are not included in other sections of labeling. Because these reactions are reported voluntarily from a population of uncertain size, it is not always possible to reliably estimate their frequency or establish a causal relationship to drug exposure.

**Immune System Disorders:** hypersensitivity reactions (including allergic dermatitis, angioedema, pruritis, and urticaria)

**Skin and Subcutaneous Tissue Disorders:** rash

## DRUG INTERACTIONS

### Drugs Having Clinically Important Interactions with INGREZZA

**Table 2: Clinically Significant Drug Interactions with INGREZZA**

| <b>Monoamine Oxidase Inhibitors (MAOIs)</b> |                                                                                                                                                                                                                                                                                                                        |
|---------------------------------------------|------------------------------------------------------------------------------------------------------------------------------------------------------------------------------------------------------------------------------------------------------------------------------------------------------------------------|
| <b>Clinical Implication:</b>                | Concomitant use of INGREZZA with MAOIs may increase the concentration of monoamine neurotransmitters in synapses, potentially leading to increased risk of adverse reactions such as serotonin syndrome, or attenuated treatment effect of INGREZZA.                                                                   |
| <b>Prevention or Management:</b>            | Avoid concomitant use of INGREZZA with MAOIs.                                                                                                                                                                                                                                                                          |
| <b>Examples:</b>                            | isocarboxazid, phenelzine, selegiline                                                                                                                                                                                                                                                                                  |
| <b>Strong CYP3A4 Inhibitors</b>             |                                                                                                                                                                                                                                                                                                                        |
| <b>Clinical Implication:</b>                | Concomitant use of INGREZZA with strong CYP3A4 inhibitors increased the exposure (C <sub>max</sub> and AUC) to valbenazine and its active metabolite compared with the use of INGREZZA alone. Increased exposure of valbenazine and its active metabolite may increase the risk of exposure-related adverse reactions. |
| <b>Prevention or Management:</b>            | Reduce INGREZZA dose when INGREZZA is coadministered with a strong CYP3A4 inhibitor.                                                                                                                                                                                                                                   |
| <b>Examples:</b>                            | itraconazole, ketoconazole, clarithromycin                                                                                                                                                                                                                                                                             |
| <b>Strong CYP2D6 Inhibitors</b>             |                                                                                                                                                                                                                                                                                                                        |
| <b>Clinical Implication:</b>                | Concomitant use of INGREZZA with strong CYP2D6 inhibitors may increase the exposure (C <sub>max</sub> and AUC) to valbenazine's active metabolite compared with the use of INGREZZA alone. Increased exposure of active metabolite may increase the risk of exposure-related adverse reactions.                        |
| <b>Prevention or Management:</b>            | Consider reducing INGREZZA dose based on tolerability when INGREZZA is coadministered with a strong CYP2D6 inhibitor.                                                                                                                                                                                                  |
| <b>Examples:</b>                            | paroxetine, fluoxetine, quinidine                                                                                                                                                                                                                                                                                      |
| <b>Strong CYP3A4 Inducers</b>               |                                                                                                                                                                                                                                                                                                                        |
| <b>Clinical Implication:</b>                | Concomitant use of INGREZZA with a strong CYP3A4 inducer decreased the exposure of valbenazine and its active metabolite compared to the use of INGREZZA alone. Reduced exposure of valbenazine and its active metabolite may reduce efficacy.                                                                         |
| <b>Prevention or Management:</b>            | Concomitant use of strong CYP3A4 inducers with INGREZZA is not recommended.                                                                                                                                                                                                                                            |
| <b>Examples:</b>                            | rifampin, carbamazepine, phenytoin, St. John's wort <sup>1</sup>                                                                                                                                                                                                                                                       |
| <b>Digoxin</b>                              |                                                                                                                                                                                                                                                                                                                        |
| <b>Clinical Implication:</b>                | Concomitant use of INGREZZA with digoxin increased digoxin levels because of inhibition of intestinal P-glycoprotein (P-gp).                                                                                                                                                                                           |
| <b>Prevention or Management:</b>            | Digoxin concentrations should be monitored when co-administering INGREZZA with digoxin. Increased digoxin exposure may increase the risk of exposure related adverse reactions. Dosage adjustment of digoxin may be necessary.                                                                                         |

<sup>1</sup> The induction potency of St. John's wort may vary widely based on preparation.

### Drugs Having No Clinically Important Interactions with INGREZZA

Dosage adjustment for INGREZZA is not necessary when used in combination with substrates of CYP1A2, CYP2B6, CYP2C8, CYP2C9, CYP2C19, CYP2E1, or CYP3A4/5 based on *in vitro* study results.

## OVERDOSAGE

### Human Experience

The pre-marketing clinical trials involving INGREZZA in approximately 850 subjects do not provide information regarding symptoms with overdose.

### Management of Overdosage

No specific antidotes for INGREZZA are known. In managing overdose, provide supportive care, including close medical supervision and monitoring, and consider the possibility of multiple drug involvement. If an overdose occurs, consult a Certified Poison Control Center (1-800-222-1222 or www.poison.org).

For further information on INGREZZA, call 84-INGREZZA (844-647-3992).

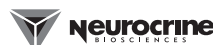

Distributed by:  
 Neurocrine Biosciences, Inc.  
 San Diego, CA 92130  
 INGREZZA is a registered trademark of Neurocrine Biosciences, Inc.  
 CP-VBZ-US-0203v3 08/18

## ONE CAPSULE, ONCE DAILY<sup>1</sup>

Convenient, once-daily dosing  
without complex titration<sup>1</sup>

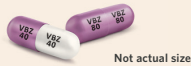

- INGREZZA 80 mg provided rapid and significant reductions in TD severity by 6 weeks<sup>1,2</sup>  
—with continued reductions in TD severity through 48 weeks<sup>1,3</sup>
- Generally well tolerated in clinical trials across a broad range of adult TD patients<sup>1,2</sup>
- INGREZZA is specific to VMAT2, with no appreciable off-target binding affinity for serotonergic or dopaminergic receptors<sup>1</sup>

VMAT2, vesicular monoamine transporter 2.

Not an actual patient

SIGN UP FOR NEWS AND UPDATES AT [WWW.INGREZZAHCP.COM/REGISTER](http://WWW.INGREZZAHCP.COM/REGISTER)

### Important Information

#### INDICATION & USAGE

INGREZZA<sup>®</sup> (valbenazine) capsules is indicated for the treatment of adults with tardive dyskinesia.

#### IMPORTANT SAFETY INFORMATION

##### CONTRAINDICATIONS

INGREZZA is contraindicated in patients with a history of hypersensitivity to valbenazine or any components of INGREZZA. Rash, urticaria, and reactions consistent with angioedema (e.g., swelling of the face, lips, and mouth) have been reported.

##### WARNINGS & PRECAUTIONS

###### Somnolence

INGREZZA can cause somnolence. Patients should not perform activities requiring mental alertness such as operating a motor vehicle or operating hazardous machinery until they know how they will be affected by INGREZZA.

###### QT Prolongation

INGREZZA may prolong the QT interval, although the degree of QT prolongation is not clinically significant at concentrations expected with recommended dosing. INGREZZA should be avoided in patients with congenital long QT syndrome or with arrhythmias associated with a prolonged QT interval. For patients at increased risk of a prolonged QT interval, assess the QT interval before increasing the dosage.

##### ADVERSE REACTIONS

The most common adverse reaction ( $\geq 5\%$  and twice the rate of placebo) is somnolence. Other adverse reactions ( $\geq 2\%$  and  $>$ placebo) include: anticholinergic effects, balance disorders/falls, headache, akathisia, vomiting, nausea, and arthralgia.

You are encouraged to report negative side effects of prescription drugs to the FDA. Visit MedWatch at [www.fda.gov/medwatch](http://www.fda.gov/medwatch) or call 1-800-FDA-1088.

**Please see the adjacent page for brief summary of Prescribing Information and visit [www.INGREZZAHCP.com](http://www.INGREZZAHCP.com) for full Prescribing Information.**

**REFERENCES:** 1. INGREZZA [package insert]. San Diego, CA: Neurocrine Biosciences, Inc; 2018. 2. Hauser RA, Factor SA, Marder SR, et al. KINECT 3: a phase 3 randomized, double-blind, placebo-controlled trial of valbenazine for tardive dyskinesia. *Am J Psychiatry*. 2017;174(5):476-484. 3. Factor SA, Remington G, Comella CL, et al. The effects of valbenazine in participants with tardive dyskinesia: results of the 1-Year KINECT 3 extension study. *J Clin Psychiatry*. 2017;78(9):1344-1350.
