OCTOBER 2018

175<sup>th</sup> Year of Publication

OCTOBER 2018 | VOLUME 175 | NUMBER 10

# The American Journal of Psychiatry

VOLUME 175 | NUMBER 10

THE AMERICAN JOURNAL OF PSYCHIATRY

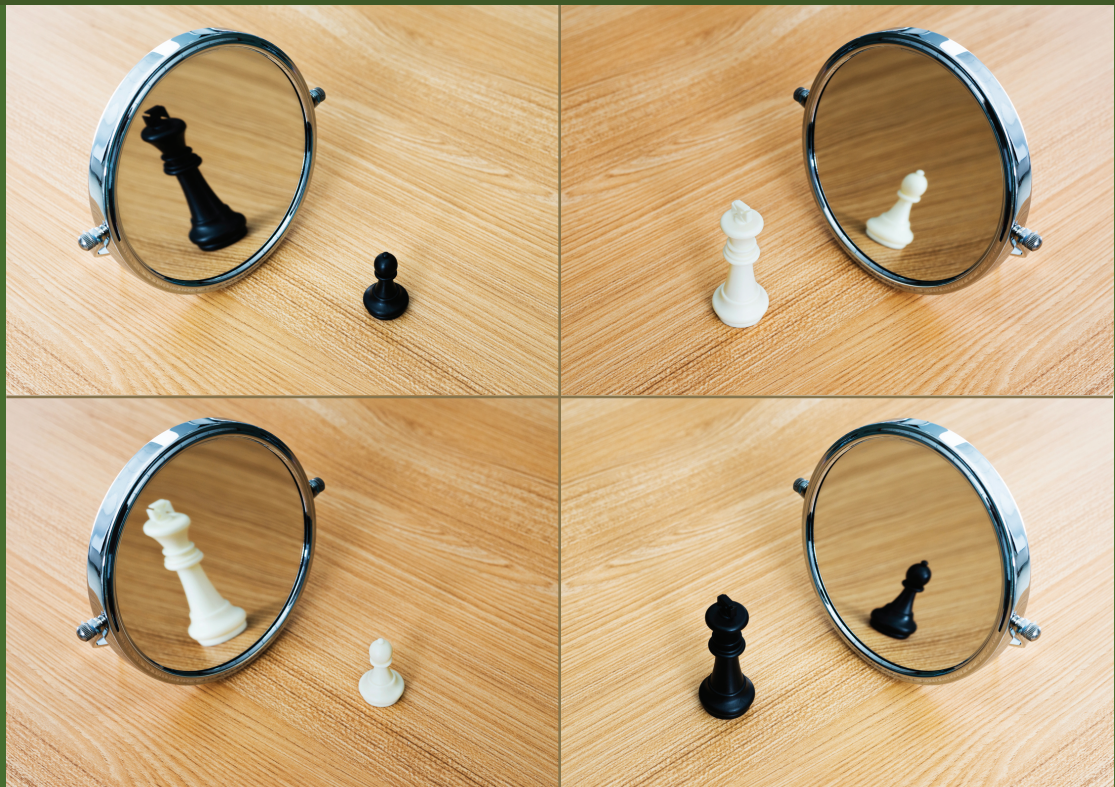

Insight Into Insight in Psychotherapy

Predicting Suicide Attempts and Suicide Deaths Following  
Outpatient Visits Using Electronic Health Records

Medications for Alcohol and Opioid Use Disorders and Risk  
of Suicidal Behavior, Accidental Overdoses, and Crime

Individual Treatment of Posttraumatic Stress Disorder Using  
Mantram Repetition: A Randomized Clinical Trial

AMERICAN  
PSYCHIATRIC  
ASSOCIATION

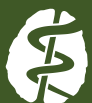

[ajp.psychiatryonline.org](http://ajp.psychiatryonline.org)
