## PERSPECTIVAS

### EDITORIALES

- 921 Anticipar el suicidio será difícil, pero esto es un avance** | *Adam M. Chekroud, Ph.D.*
- 923 Reflexión sobre la introspección en psicoterapia** | *Per Høglend, M.D., Ph.D.*
- 925 Microscopios y telescopios: el impacto en la sociedad del tratamiento del trastorno por consumo de sustancias**  
*Hilary S. Connery, M.D., Ph.D., Roger D. Weiss, M.D.*
- 927 La evidencia por encima del dogma: Acogida de un repertorio creciente de opciones de tratamiento de TEPT**  
*Robin L. Aupperle, Ph.D.*

### TRATAMIENTO EN PSIQUIATRÍA

- 929 Aliviando la carga de salud mental de la discriminación estructural y los crímenes de odio: El papel de los psiquiatras**  
*Helena Hansen, M.D., Ph.D., et al.* **EMC • AUDIO**

### IMÁGENES EN PSIQUIATRÍA

- 934 La comida interrumpida de Heinrich von Rustige** | *Luca Cambioli, M.D., Michele Augusto Riva, M.D., Ph.D.*

### REVISIÓN Y RESEÑAS

- 935 Genética molecular y nuevas estrategias de medicación para la adicción a los opiáceos**

*Yasmin L. Hurd, Ph.D., Charles P. O'Brien, M.D.*

[The *OPRM1* gene, which codes for the mu opioid receptor, has variants that influence patients' sensitivity to opiates. These variants are potentially useful for predicting a patient's analgesic dose and risk of addiction.]

- 943 Descubrimientos de la genética del TDAH en el siglo XXI: Nuevos hallazgos y sus implicaciones**

*Anita Thapar, F.R.C.Psych., Ph.D.*

[Genetic studies indicate that both ADHD traits and their associated genes are common to other disorders, including autism spectrum disorder in childhood and major depressive disorder in later life. Treatment of ADHD symptoms should consider the possibility of these illnesses as well.]

## NUEVAS INVESTIGACIONES

### ARTÍCULOS

- 951 Predicción de los intentos de suicidio y las muertes por suicidio después de las consultas de pacientes ambulatorios utilizando las historias clínicas electrónicas**

*Gregory E. Simon, M.D., M.P.H., et al.* **EDITORIALE • AUDIO • VIDEO**

[A prediction algorithm for suicide-related behavior was derived from both self-reported depressive symptoms and health record information. The algorithm, implemented in the electronic health record, can alert clinicians to patients at highest risk for suicide-related behavior.]

- 961 Asociación entre la introspección y el resultado de la psicoterapia: Revisión sistemática y meta-análisis**

*Simone Jennissen, M.Sc., et al.* **EDITORIALE • EMC • AUDIO**

[A meta-analysis finds that patients' insight into their interpersonal challenges, emotional experience, and psychological symptoms may be as important as other treatment factors—such as the therapeutic alliance and empathy—for psychotherapy outcome.]

- 970 Los medicamentos para los trastornos por consumo de alcohol y de opiáceos y el riesgo de comportamiento suicida, las sobredosis accidentales y la delincuencia**

*Yasmina Molero, Ph.D., et al.* **EDITORIALE • AUDIO**

[A Swedish population-wide study found that naltrexone and buprenorphine reduced death from accidental overdose, but methadone increased it. Buprenorphine and methadone both reduced criminal acts, and methadone decreased suicidal behavior.]

- 979 Tratamiento individual del trastorno de estrés postraumático utilizando la repetición mantra: Un ensayo controlado aleatorizado**

*Jill E. Bormann, Ph.D., R.N., et al.* **EDITORIALE • EMC • AUDIO • VIDEO**

[A randomized trial of 173 veterans with military trauma found that mantram repetition therapy produced greater reductions in PTSD scores than present-centered therapy, but the number achieving clinically meaning change was not significantly different. Both are non-trauma-focused treatments for PTSD.]

**989 Meta-análisis de 89 estudios de IRM estructural en el trastorno de estrés postraumático y comparación con el trastorno de depresión mayor**

*Konstantinos Bromis, M.Sc., Ph.D., et al.*

[A comprehensive meta-analysis of MRI studies compared PTSD patients with traumatized and non-traumatized controls. PTSD patients had lower intracranial volume, with the greatest changes in the hippocampus and cingulate cortex.]

**999 Compensación sináptica del proteoma y resiliencia a la psicosis en la enfermedad de Alzheimer**

*Josh M. Krivinko, B.S., et al.*

[Quantitative immunohistochemistry analysis of brain tissue from more than 150 subjects with Alzheimer's disease showed that patients who had not developed psychosis had higher levels of synaptic proteins, which was not predictable from their overall level of pathology. A compensatory mechanism that alters transport of proteins to and from the synaptic density is proposed.]

**1010 Trayectorias de desarrollo de la corteza orbitofrontal y anhedonia en el período intermedio de la infancia y riesgo de consumo de sustancia en la adolescencia en una muestra longitudinal de niños de edad preescolar deprimidos y sanos**

*Joan L. Luby, M.D., et al.*

[Decreased childhood development of the orbitofrontal cortex is associated with increased levels of anhedonia and early onset of abuse of marijuana and alcohol. The finding was specific to anhedonia, regardless of whether the child did or did not have depression.]

**COMUNICADOS Y ACTUALIZACIONES**

**CARTAS AL EDITOR**

**1022 La gama de psicoterapias para el TEPT** | *John C. Markowitz, M.D.*

**1022 Necesidad urgente de terapias nuevas y mejoradas para el TEPT: Respuesta a Markowitz**

*Murray B. Stein, M.D., M.P.H., Barbara O. Rothbaum, Ph.D., A.B.P.P.*

**1023 Avances en TEPT** | *Spencer Eth, M.D.*

**1023 Fundamentos de la psiquiatría de consulta-enlace** | *Graeme J. Taylor, M.D.*

**RESEÑAS BIBLIOGRÁFICAS**

**1024 Ethics Challenges in Forensic Psychiatry and Psychology Practice [Retos éticos en la psiquiatría forense y la práctica de psicología]**

*Darren L. Lish, M.D., D.F.A.P.A.*

**1025 Student Mental Health: A Guide for Psychiatrists, Psychologists, and Leaders Serving in Higher Education [La salud mental de los estudiantes: Una guía para psiquiatras, psicólogos y líderes en la educación superior]**

*Rachel Davis, M.D.*

**1027 Libros recibidos**

**ACTOS OFICIALES**

**1028 Informes del Concejo de la APA**

**1046 Evaluación y tratamiento de pacientes de género variable y con disforia de género: Un manual para psiquiatras**

*William Byne, M.D., Ph.D., et al.*

**OTROS TEMAS DE INTERÉS**

**1026 [Correction]**

**1047 Educación Médica Continuada**

**Cubierta:** En el presente número, una revisión sistemática y un meta-análisis realizados por Jennissen et al. (p. 961) mostraron que una mayor introspección de los pacientes estaba asociada a mejores resultados de varias modalidades de tratamiento. [Images by Baona, Istockphoto.com]

**AUDIO** Article is highlighted in AJP Audio, a downloadable .mp3 file available at [ajp.psychiatryonline.org](http://ajp.psychiatryonline.org)

**EDITORIALE** Article is discussed in one of the issue's editorials

**EMC** A course covering the content of this article is available online for paid subscribers to the AJP CME Course program

**VIDEO** Article is highlighted online by Deputy Editor Daniel S. Pine, M.D.

**La Tabla de Contenidos y resúmenes de Este Número Está Disponible en Español**  
(Abstracts are also available in Spanish)

Translation presented in collaboration with the Office of Global Health, Rutgers-Robert Wood Johnson Medical School. Support for this effort provided by ACTA Colombia.

**Translation courtesy of**

**Sergi Casals, M.A.**, Garuna, Medellín, Colombia ([www.garunaeditors.com](http://www.garunaeditors.com))

**Carlos López Jaramillo, M.D., M.Sc., Ph.D.**, Universidad de Antioquia, Medellín, Colombia

**Javier I. Escobar, M.D., M.Sc.**, Rutgers-Robert Wood Johnson Medical School

## Genética molecular y nuevas estrategias de medicación para la adicción a los opiáceos

Yasmin L. Hurd, Ph.D., Charles P. O'Brien, M.D.

La epidemia de opiáceos está en el epicentro de la crisis de fármacos y tiene como resultados un número inconcebible de muertes por sobredosis y costos médicos desorbitados que han afectado muchas comunidades en todo el espectro socio-económico de los Estados Unidos. Los medicamentos clásicos para el tratamiento del trastorno por consumo de opiáceos tienen como objetivo principal el sistema opiáceo, por lo que han sido infrutilizadas, en parte debido a su propio potencial de abuso y la gran carga legislativa que su uso comporta para pacientes y clínicos. Actualmente se está dando una evolución del uso de los antagonistas de los opiá-

ceos, no solo para prevenir sobredosis agudas, sino como opciones de tratamiento de uso extendido. Las estrategias cuyo objetivo son factores genéticos y epigenéticos específicos, junto con las nuevas medicaciones no-opiáceas, son prometedoras como futuras intervenciones terapéuticas para el abuso de opiáceos. Existe la esperanza de que el hecho de conseguir que los recursos clínicos incluyan más opciones de tratamiento ayudará a acabar con el patrón histórico de epidemias de opiáceos recurrente.

*(Am J Psychiatry 2018; 175:935–942)*

### AJP a los 175 años

Recordando nuestro pasado mientras visualizamos nuestro futuro

#### La adicción a las drogas en relación a los problemas de la adolescencia

Zimmering y sus colegas escribieron, en medio de una epidemia de opiáceos en jóvenes, que "solamente el ser humano, o más bien ciertos tipos de seres humanos, volverán al hábito esclavizante y auto-destructivo".

*(Am J Psychiatry 1952; 109:272–278)*

## Descubrimientos de la genética del TDAH en el siglo XXI: Nuevos hallazgos y sus implicaciones

Anita Thapar, F.R.C.Psych., Ph.D.

El siglo XXI ha sido testigo del descubrimiento de múltiples variantes genéticas comunes y menos frecuentes asociadas al trastorno por déficit de atención e hiperactividad (TDAH) y dichos descubrimientos ya han brindado un punto de partida para la investigación de la biología del trastorno y nuevos tratamientos. El objetivo de esta revisión selectiva es examinar los hallazgos genéticos de los últimos 5 años y considerar sus implicaciones para la conceptualización del TDAH y la práctica clínica futura. Descubrimientos recientes revelan las fuertes sobreposiciones genéticas entre el TDAH y el trastorno del espectro autista (TAU), así como la incapacidad intelectual. Así, la eliminación de los anteriores criterios de exclusión para el TDAH en presencia de TAU es un cambio bienvenido en el DSM-5. Sin embargo, el TDAH también muestra correlaciones genéticas sustanciales con un grupo mucho más amplio de trastornos neuropsiquiátricos y con afecciones no psiquiátricas (p.ej., cáncer de pulmón). Investigar potenciales explicaciones de estos enlaces es un importante paso a seguir. El TDAH, aunque en la práctica clínica se

conceptualice convenientemente como un trastorno, puede verse como un rasgo. Hallazgos recientes de estudios de asociación del genoma completo, coincidiendo con estudios de gemelos, resaltan que el TDAH se encuentra en el extremo de una dimensión distribuida de forma continua, similar a lo que ocurre con la hipertensión en el continuo de la presión sanguínea. Aunque los niveles de TDAH típicamente disminuyen con la edad, estudios de gemelos y moleculares sugieren que una trayectoria persistente está asociada a una mayor carga genética. Las pruebas de rutina para las mutaciones raras en TDAH todavía no se recomiendan, aunque en muchos países las directrices recomiendan hacer pruebas a los individuos con deterioro intelectual moderado o TAU, de modo que la práctica podría cambiar. Las variantes genéticas comunes de TDAH son solamente predictores débiles y por lo tanto tienen poco valor clínico en la actualidad, igual que la farmacogenómica.

*(Am J Psychiatry 2018; 175:943–950)*

### AJP a los 175 años

Recordando nuestro pasado mientras  
visualizamos nuestro futuro

#### **Noviembre 1938: Análisis electroencefalográficos de niños con problemas de comportamiento**

El electroencefalograma fue la primera técnica biológica que se aplicó a los trastornos comportamentales en la infancia. Jasper, Solomon y Bradley reportaron que "el electroencefalograma ha logrado revelar una anomalía definida de la función cerebral en más de la mitad de un grupo trastornos comportamentales de la infancia que anteriormente se habían considerado mayormente psicogénicos."

*(Am J Psychiatry 1938; 95:641–658)*

# Predicción de los intentos de suicidio y las muertes por suicidio después de las consultas de pacientes ambulatorios, utilizando las historias clínicas electrónicas

Gregory E. Simon, M.D., M.P.H., Eric Johnson, M.S., Jean M. Lawrence, Sc.D., Rebecca C. Rossom, M.D., M.S., Brian Ahmedani, Ph.D., Frances L. Lynch, Ph.D., Arne Beck, Ph.D., Beth Waitzfelder, Ph.D., Rebecca Ziebell, Robert B. Penfold, Ph.D., Susan M. Shortreed, Ph.D.

**Objetivo:** Los autores se propusieron desarrollar y validar modelos, utilizando historias clínicas electrónicas, para predecir los intentos de suicidio y la muerte por suicidio después de una consulta de un paciente ambulatorio.

**Método:** En siete sistemas de salud, 2.960.929 pacientes de 13 años o más (edad media, 46 años; 62% mujeres) hicieron 10.275.853 consultas en la especialidad de salud mental y 9.685.206 consultas de atención primaria con diagnósticos de salud mental, entre el 1 de enero de 2009 y el 30 de junio de 2015. Los datos de los registros de los sistemas de salud y de los certificados estatales de defunción identificaron intentos de suicidio (N=24.133) y muertes por suicidio (N=1.240) en un periodo de 90 días después de cada visita. Los predictores potenciales incluyeron 313 características demográficas y clínicas extraídas de registros de hasta 5 años antes de cada visita: anteriores intentos de suicidio, diagnósticos de salud mental y consumo de sustancias, diagnósticos médicos, despacho de medicaciones psiquiátricas, atención hospitalaria o en urgencias y cuestionarios de depresión administrados de forma rutinaria. Se desarrollaron modelos de regresión logística de predicción de los intentos de suicidio y muerte por suicidio, utilizando la selección de variables LASSO (contracción absoluta mínima y regresión del operador de la selección) en una muestra aleatoria del 65% de las consultas y validada en el 35% restante.

**Resultados:** Las consultas al especialista de salud mental con puntuaciones de riesgo en el rango del 5% superior explicaron el 43% de los intentos de suicidio subsiguientes y el 48% de las muertes por suicidio. De los pacientes que obtuvieron una puntuación en el rango del 5% más alto, el 5,4% intentaron suicidarse y el 0,26% murieron por suicidio en los siguientes 90 días. Las estadísticas-C (equivalente al área bajo la curva) para la predicción de intentos de suicidio y muerte por suicidio fueron 0,851 (IC 95%=0,848, 0,853) y 0,861 (IC 95%=0,848, 0,875) respectivamente. Las consultas de atención primaria con puntuaciones en el rango del 5% superior explicaron el 48% de los intentos de suicidio subsiguientes y el 43% de las muertes por suicidio. Las estadísticas-C para la predicción de intento de suicidio y muerte por suicidio fueron 0,853 (IC 95%=0,849, 0,857) y 0,833 (IC 95%=0,813, 0,853) respectivamente.

**Conclusiones:** Los modelos de predicción que incorporan los datos de la historia clínica y las respuestas a cuestionarios de auto-reporte superan sustancialmente las herramientas existentes de predicción de riesgo de suicidio.

(*Am J Psychiatry* 2018; 175:951–960)

## Asociación entre la introspección y el resultado de la psicoterapia: Revisión sistemática y meta-análisis

Simone Jennissen, M.Sc., Julia Huber, M.Sc., Johannes C. Ehrenthal, Ph.D., Henning Schauenburg, M.D., Ulrike Dinger, D.Sc., M.D.

**Objetivo:** Una mayor comprensión de los patrones disfuncionales repetitivos y su relación con la historia de vida de un individuo se considera un mecanismo de cambio clave en las terapias orientadas a la introspección. Al mismo tiempo, investigación empírica sobre la relación introspección-resultado es poco frecuente y su generalizabilidad está restringida por el uso de un amplio rango de definiciones y métodos en los diferentes estudios. Los autores realizaron un meta-análisis para examinar sistemáticamente la asociación entre la introspección de los pacientes y el resultado de la psicoterapia en una gama de modalidades de tratamiento.

**Método:** La introspección se definió como la comprensión que tienen los pacientes de las asociaciones entre experiencias pasadas y presentes, los patrones típicos de las relaciones y la relación entre los retos personales, la experiencia emocional y los síntomas psicológicos. De 13.849 resúmenes (*abstracts*) identificados inicialmente, los autores extrajeron

23 con tamaños de efecto independientes. Se realizó un meta-análisis de efectos aleatorios para evaluar la magnitud de la relación introspección-resultado. El riesgo de sesgo de la publicación se evaluó con inspecciones de gráficos de embudo, la prueba de regresión de Egger y el método de ajuste y relleno de Duval y Tweedie como análisis de sensibilidad.

**Resultados:** Se observó una correlación significativa moderada ( $r=0,31$ ) entre la introspección y el resultado del tratamiento. Los análisis de sensibilidad demostraron la solidez de los resultados.

**Conclusiones:** Los hallazgos sustentan la importancia de la introspección para el resultado de la psicoterapia. La introspección puede ser un mecanismo de cambio relevante en diferentes modalidades de tratamiento.

(*Am J Psychiatry* 2018; 175:961–969)

# Los medicamentos para los trastornos por consumo de alcohol y de opiáceos y el riesgo de comportamiento suicida, las sobredosis accidentales y la delincuencia

Yasmina Molero, Ph.D., Johan Zetterqvist, Ph.D., Ingrid A. Binswanger, M.D., Clara Hellner, Ph.D., Henrik Larsson, Ph.D., Seena Fazel, M.D.

**Objetivo:** Los autores examinaron las asociaciones entre los medicamentos para los trastornos por consumo de alcohol y de opiáceos (acamprosato, naltrexona, metadona y buprenorfina) y el comportamiento suicida, las sobredosis accidentales y la delincuencia.

**Método:** En este estudio de cohorte de la población total, se identificaron 21.281 individuos que recibían tratamiento como mínimo con uno de los cuatro medicamentos entre 2005 y 2013. Se recogieron datos de los registros suecos basados en la población, sobre el uso de medicamentos y los resultados. Se utilizó un diseño intra-sujeto (utilizando los riesgos proporcionales estratificados de Cox) para comparar las tasas de comportamiento suicida, las sobredosis accidentales y la delincuencia para los mismos individuos durante el periodo en el que estaban recibiendo la medicación en comparación con el periodo en el que no la estaban recibiendo.

**Resultados:** No se encontró ninguna asociación significativa con ninguno de los resultados primarios para el acamprosato. Para la naltrexona, hubo una reducción del cociente de

riesgo para las sobredosis accidentales durante los periodos en los que los individuos recibían tratamiento en comparación con los periodos en los que no lo recibían (cociente de riesgo=0,82; IC 95%=0,70 a 0,96). La buprenorfina se asoció a tasas reducidas de arresto para todas las categorías de delito (p. ej., violento, no violento y relacionado con sustancias) y a la reducción de sobredosis accidentales (cociente de riesgo= 0,75; IC 95%=0,60 a 0,93). Para la metadona, hubo reducciones significativas de la tasa de comportamientos suicidas (cociente de riesgo=0,60; IC 95%=0,40–0,88) y reducciones de todas las categorías de delito. Sin embargo, hubo un riesgo de sobredosis accidental aumentado en los individuos que tomaban metadona (cociente de riesgo=1,25; IC 95%=1,13 a 1,38).

**Conclusiones:** Los medicamentos utilizados actualmente para tratar los trastornos por consumo de alcohol y de opiáceos también parecen reducir la intención de suicidio y la delincuencia durante el tratamiento.

(*Am J Psychiatry* 2018; 175:970–978)

## Tratamiento individual del trastorno de estrés postraumático utilizando la repetición mantra: Un ensayo controlado aleatorizado

Jill E. Bormann, Ph.D., R.N., Steven R. Thorp, Ph.D., A.B.P.P., Eric Smith, M.D., Ph.D., Mark Glickman, Ph.D., Danielle Beck, M.P.H., C.C.R.C., Dorothy Plumb, M.A., Shibe Zhao, M.P.H., Princess E. Ackland, Ph.D., M.S.P.H., Carie S. Rodgers, Ph.D., A.B.P.P., Pia Heppner, Ph.D., Lawrence R. Herz, M.D., A. Rani Elwy, Ph.D.

**Objetivo:** Estudios anteriores sugieren que la terapia grupal de repetición "mantra" (vocablo sagrado), una terapia complementaria para el trastorno de estrés postraumático (TEPT) que no está centrada en el trauma, puede ser un tratamiento efectivo para los veteranos de guerra. Los autores compararon la terapia de repetición mantra aplicada individualmente y otro tratamiento no centrado en el trauma para TEPT.

**Método:** El estudio fue un ensayo aleatorizado, en dos sitios, de asignación abierta y evaluación ciega que incluyó 173 veteranos diagnosticados con TEPT relacionado al servicio militar, en dos clínicas de pacientes ambulatorios del Departamento de Asuntos de Veteranos (*Veteran Affairs*) (enero 2012 a marzo 2014). El grupo de mantra (N=89) aprendió habilidades para la repetición mantra silenciosa, pensamientos ralentizados y atención acentuada. El grupo de comparación (N=48) recibió terapia centrada en el presente, centrándose en los eventos estresantes actuales y en habilidades de resolución de problemas. Ambos tratamientos se aplicaron individualmente en ocho sesiones semanales de una hora. La medida de resultado primaria fue el cambio en la gravedad de los síntomas de TEPT, medidos con la Escala de TEPT administrada por el clínico (CAPS, por sus siglas en inglés) y por auto-reporte. Las medidas de resultados secundarias incluían insomnio, depresión, ira, bienestar espiritual, conciencia plena (*mindfulness*) y calidad de vida. Se realizó el análisis de intención de tratar utilizando modelos lineales mixtos.

**Resultados:** El grupo de mantra tuvo mejorías significativa-

mente mayores en la puntuación CAPS que el grupo de la terapia centrada en el presente, tanto en la evaluación post-tratamiento (diferencia entre grupos a lo largo del tiempo,  $-9,98$ ; IC 95%= $-3,63$  a  $-16,00$ ;  $d=0,49$ ) como en el seguimiento a los 2 meses (diferencia entre grupos,  $-9,34$ ; IC 95%= $-1,50$  a  $-17,18$ ;  $d=0,46$ ). La gravedad de los síntomas de TEPT auto-reportada también fue más baja en el grupo mantra en comparación con el grupo de la terapia centrada en el presente en la evaluación post-tratamiento, pero no hubo ninguna diferencia en el seguimiento a los 2 meses. Los pacientes que completaron el seguimiento de 2 meses, cuyo número fue significativamente mayor en el grupo mantra (59%) que en el grupo de la terapia centrada en el presente (40%), dejaron de cumplir los criterios de TEPT ( $p<0,04$ ). Sin embargo, el porcentaje de participantes que experimentaron cambios clínicamente significativos (mejoras de  $\geq 10$  puntos) en la puntuación de CAPS no difirió significativamente entre grupos (75% del grupo mantra (en comparación con 61% del grupo de la terapia centrada en el presente). La reducción del insomnio fue significativamente mayor para los participantes del grupo mantra tanto en la evaluación post-tratamiento como en el seguimiento a los 2 meses.

**Conclusiones:** En una muestra de veteranos con TEPT, la terapia mantra aplicada individualmente, en general fue más efectiva que la terapia centrada en el presente para reducir la gravedad de los síntomas de TEPT y el insomnio.

(*Am J Psychiatry* 2018; 175:979–988)



# Meta-análisis de 89 estudios de IRM estructural en el trastorno de estrés postraumático y comparación con el trastorno de depresión mayor

Konstantinos Bromis, M.Sc., Ph.D., Maria Calem, M.Sc., Ph.D., Antje A.T.S. Reinders, Ph.D., Steven C.R. Williams, B.Sc., Ph.D., Matthew J. Kempton, M.Sc., Ph.D.

**Objetivo:** Los autores realizaron un meta-análisis exhaustivo de estudios con IRM de región de interés y de morfometría basada en véxeles (VBM, por sus siglas en inglés) en trastorno por estrés postraumático (TEPT). Dado que los pacientes tienen tasas altas de depresión comórbida, un objetivo adicional fue comparar los hallazgos con un meta-análisis de estudios con IRM en depresión.

**Método:** Se buscaron estudios en la base de datos MEDLINE desde 1985 hasta 2016. Un total de 113 estudios cumplían con los criterios de inclusión y se incluyeron en una base de datos en línea. De estos, se seleccionaron 66 para el meta-análisis de región de interés y 13 para el meta-análisis de VBM. Se realizó el meta-análisis de región de interés y se comparó con un meta-análisis de trastorno de depresión mayor. En el meta-análisis de región de interés, se hicieron tres sub-análisis que incluyeron grupos control con y sin trauma.

**Resultados:** En el meta-análisis de región de interés, se encontró que, en comparación con todos los sujetos control, los pacientes con TEPT tenían una reducción del volumen cerebral, el volumen intracraneal, y los volúmenes del hipo-

campo, la ínsula y el área cingular anterior. Los resultados de la comparación entre pacientes con TEPT y sujetos control con trauma o sin trauma, mostraron cambios similares. Los sujetos control con trauma, en comparación con los que no tenían trauma, mostraron volúmenes más pequeños del hipocampo bilateralmente. Para todas las regiones, los tamaños de efecto combinados (g de Hedges) variaron de  $-0,84$  a  $0,43$  y el número de estudios, de tres a 41. El meta-análisis de VBM reveló reducciones volumétricas prominentes en la corteza prefrontal media, incluyendo el área cingular anterior. En comparación con los datos de región de interés de pacientes con trastorno de depresión mayor, aquellos con TEPT tenían volumen cerebral total reducido y ambos trastornos estuvieron asociados a un volumen reducido del hipocampo.

**Conclusiones:** Los meta-análisis revelaron anomalías cerebrales estructurales asociadas al TEPT y al trauma y sugieren que las reducciones del volumen cerebral global diferencian el TEPT de la depresión mayor.

(*Am J Psychiatry* 2018; 175:989–998)

## Compensación sináptica del proteoma y resiliencia a la psicosis en la enfermedad de Alzheimer

Josh M. Krivinko, B.S., Susan L. Erickson, Ph.D., Ying Ding, Ph.D., Zhe Sun, M.S., Peter Penzes, Ph.D., Matthew L. MacDonald, Ph.D., Nathan A. Yates, Ph.D., Milos D. Ikonovic, M.D., Oscar L. Lopez, M.D., Robert A. Sweet, M.D., Julia Kofler, M.D.

**Objetivo:** La presencia de psicosis en la enfermedad de Alzheimer denota un fenotipo con deterioro cognitivo más rápido que en la enfermedad de Alzheimer sin psicosis. El descubrimiento de farmacoterapias nuevas que implican objetivos terapéuticos para la prevención o el tratamiento de la enfermedad de Alzheimer con psicosis se vería beneficiado si se identificara la neurobiología de la resiliencia a la psicosis en la enfermedad de Alzheimer. El objetivo primario del presente estudio fue determinar si las alteraciones del proteoma sináptico estaban asociadas a la resiliencia a los síntomas psicóticos en la enfermedad de Alzheimer y, en caso de que estuvieran presentes, si eran independientes de la carga neuropatológica.

**Método:** Se utilizó inmunohistoquímica cuantitativa para medir las múltiples neuropatologías en la corteza prefrontal dorsolateral de sujetos con enfermedad de Alzheimer temprano o en estadio medio que diferían en cuanto al estatus de psicosis. Se cuantificaron las proteínas sinápticas con cromatografía líquida acoplada a espectrometría de masa en homogenados de sustancia gris de estos sujetos y de sujetos no afectados neuropatológicamente. El proteoma sináptico se evaluó de forma similar en homogenados de sustancia gris y en fracciones de densidad postsinápticas de un ratón APPswe/PSEN1dE9 con amiloidosis con reducción de Kalrn

en la línea germinal, que se ha demostrado que confiere resiliencia a la progresión de comportamientos asociados a la psicosis relativos solamente al APPswe/PSEN1dE9.

**Resultados:** Los sujetos resilientes a los síntomas psicóticos en la enfermedad de Alzheimer tuvieron niveles más altos de proteínas sinápticas en comparación con aquellos con psicosis y con los sujetos control. La carga neuropatológica predijo menos del 20% de la varianza en el estatus de psicosis y no explicó las diferencias en el nivel de proteínas sinápticas entre los grupos. La reducción de Kalrn en ratones APPswe/PSEN1dE9 resultó en niveles altos de proteínas sinápticas en el homogenado cortical y niveles de proteínas normalizados en la densidad postsináptica.

**Conclusiones:** La acumulación de proteínas sinápticas, concretamente las que son enriquecidas en la densidad postsináptica, está asociada a la resiliencia a la psicosis en la enfermedad de Alzheimer. Un mecanismo candidato para esta compensación sináptica del proteoma es la alteración en los niveles de proteínas que facilitan el transporte de proteínas sinápticas a y desde la densidad postsináptica.

*(Am J Psychiatry 2018; 175:999–1009)*

# Trayectorias de desarrollo de la corteza orbitofrontal y anhedonia en el período intermedio de la infancia y riesgo de consumo de sustancia en la adolescencia en una muestra longitudinal de niños de edad preescolar deprimidos y sanos

Joan L. Luby, M.D., Arpana Agrawal, Ph.D., Andy Belden, Ph.D., Diana Whalen, Ph.D., Rebecca Tillman, M.S., Deanna M. Barch, Ph.D.

**Objetivo:** Los déficits en el procesamiento de recompensas están establecidos en los trastornos del ánimo y de consumo de sustancias y son factores de riesgo conocidos para estos trastornos. Se ha demostrado que las reducciones de volumen de la corteza orbitofrontal y del estriado, regiones que ayudan la respuesta neural a la recompensa, están relacionadas con la anhedonia en los trastornos depresivo y de consumo de sustancias. Los autores se propusieron investigar cómo la maduración estructural de estas regiones en la infancia varía con el nivel de anhedonia y cómo predice el posterior consumo de sustancias.

**Método:** El estudio empleó datos de una muestra de niños en edad pre-escolar deprimidos y sanos que incluía tres tandas de neuroimágenes desde la edad escolar hasta la adolescencia. Tres años después de la tercera escanografía, entre las edades de 13-18, a los participantes se les hizo una evaluación exhaustiva del comportamiento y del consumo de sustancias. Se utilizaron modelos multinivel para investigar la relación entre la anhedonia y las trayectorias de crecimiento del estriado y la corteza orbitofrontal. Luego se utilizaron modelos de regresión de Poisson de cero-inflado para

determinar si las intercepciones y las pendientes de estas trayectorias predecían la posterior frecuencia de consumo de alcohol y marihuana en la adolescencia.

**Resultados:** La interacción de la anhedonia con la edad fue significativa en los modelos multinivel del volumen cortical orbitofrontal, pero no del volumen del estriado. Las evaluaciones más altas de anhedonia se asociaron de manera significativa a un declive más pronunciado del volumen cortical orbitofrontal con la edad. El volumen y el grosor de la corteza orbitofrontal a los 12 años y la trayectoria a lo largo del tiempo predijeron en forma significativa y en dirección negativa la subsiguiente frecuencia de consumo de alcohol y marihuana, pero no la depresión durante la adolescencia.

**Conclusiones:** Los hallazgos sugieren que el desarrollo de la corteza orbitofrontal durante la niñez está estrechamente relacionado con las experiencias de anhedonia y que estas trayectorias de crecimiento predicen el consumo de sustancias durante un período crítico del desarrollo.

(*Am J Psychiatry* 2018; 175:1010–1021)
